# Supplementary material for: A facile microwave-assisted synthesis of Ag@SiO2 nanoparticles for Raman spectroscopy
Source: Royal Society of Chemistry journal article supplement (doi:10.1039/d1nj01439k), 2021-01-01
Supplement: d1nj01439k1.pdf [file d1nj01439k1.pdf]

## Supporting Information

### Facile microwave-assisted synthesis of Ag@SiO<sub>2</sub> nanoparticles for Raman spectroscopy

Edita Daublytė<sup>1</sup>, Agnė Zdaniauskienė<sup>1</sup>, Martynas Talaikis<sup>2</sup>, Audrius Drabavičius<sup>3</sup>, Tatjana Charkova<sup>1\*</sup>

<sup>1</sup>Department of Organic Chemistry, Center for Physical Sciences and Technology, Saulėtekio Ave. 3, LT-10257 Vilnius, Lithuania

<sup>2</sup>Department of Bioelectrochemistry and Biospectroscopy, Institute of Biochemistry, Life Sciences Center, Vilnius University, Saulėtekio Ave. 7, LT-10257 Vilnius, Lithuania

<sup>3</sup>Department of Characterization of Materials Structure, Center for Physical Sciences and Technology, Saulėtekio Ave. 3, LT-10257 Vilnius, Lithuania

\*Corresponding author, email: [tatjana.charkova@ftmc.lt](mailto:tatjana.charkova@ftmc.lt), ORCID: 0000-0002-2043-9024

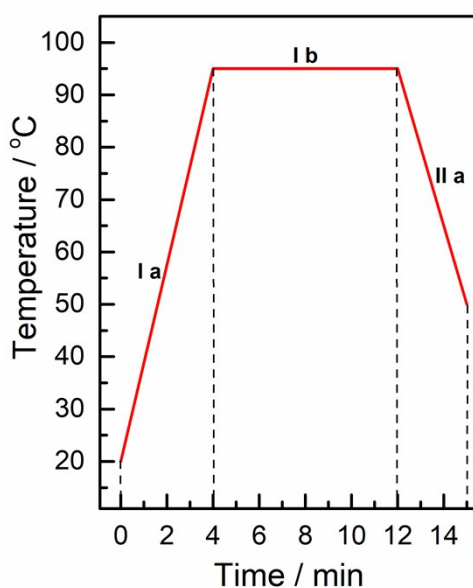

**Fig. S1** Temperature evolution in Ag NPs one-stage microwave synthesis. I a region corresponds to stepped temperature increase up to 95 °C, while I b region indicates maintained temperature by applying 100 W microwave power. II a region corresponds to temperature decrease to 50 °C.

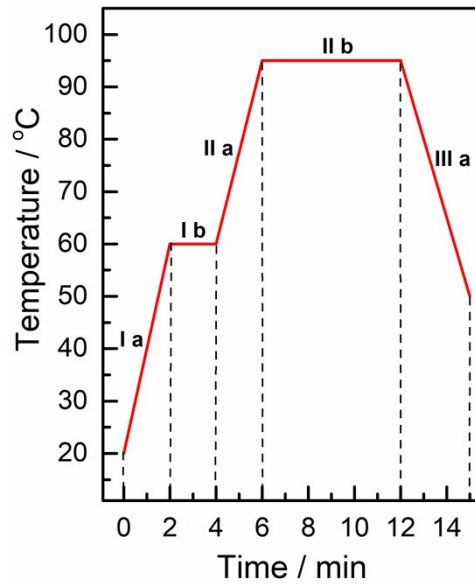

**Fig. S2** Temperature evolution in Ag NPs two-stage microwave synthesis. I a, II a regions correspond to stepped temperature increase up to 60 °C and 95 °C, while I b, II b regions indicate maintained temperature by applying 100 W microwave power. III a region corresponds to temperature decrease to 50 °C.

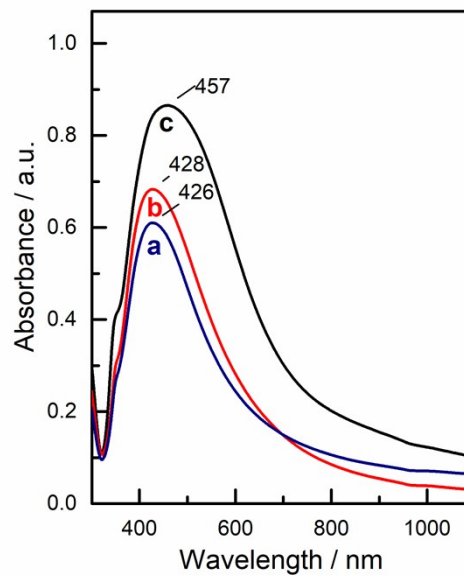

**Fig. S3** UV/Vis spectra of Ag NPs synthesized by one-stage temperature regime (a), two-stage temperature regimes (b), and three-stage temperature regimes (c) in the range of 300–1100 nm.
